# Supplementary material for: Genomic Insights into Methicillin-Resistant Staphylococcus aureus spa Type t899 Isolates Belonging to Different Sequence Types
Source: PubMed Central journal article supplement (PMC8105008; doi:10.1128/aem.01994-20), 2021-02-26
Supplement: AEM.01994-20-s0001.pdf [file AEM.01994-20-s0001.pdf]

**Supplementary table 1: Methicillin-resistant and susceptible *Staphylococcus aureus* t899 isolates belonging to different sequence types**

| <b>Id</b> | <b>Isolate</b> | <b>Country</b> | <b>Year</b> | <b>Detailed Source</b> | <b>Methicillin</b> | <i>arcC</i> | <i>aroE</i> | <i>glpF</i> | <i>gmk</i> | <i>pta</i> | <i>tpi</i> | <i>yqiL</i> | <b>ST (MLST)</b> |
|-----------|----------------|----------------|-------------|------------------------|--------------------|-------------|-------------|-------------|------------|------------|------------|-------------|------------------|
| 3327      | P_37           | Switzerland    | 2008        | pig nasal swab         | R                  | 3           | 3           | 1           | 1          | 1          | 1          | 10          | 9                |
| 2693      | 1110807020     | China          | 2008        | environment            | R                  | 3           | 73          | 1           | 1          | 1          | 1          | 10          | 1376             |
| 2358      | NICPBP-ST-P65  | China          | 2008        | animal                 | R                  | 3           | 203         | 1           | 1          | 1          | 1          | 10          | 1297             |
| 4924      | PUMCH2128      | China          | 2010        | sputum                 | R                  | 3           | 3           | 1           | 1          | 1          | 1          | 296         | 2593             |
| 557       | G16            | China          | 2013        | swine                  | R                  | 3           | 3           | 1           | 1          | 1          | 264        | 10          | 164              |
| 3541      | M15            | China          | 2016        | pig fecal              | R                  | 3           | 3           | 1           | 1          | 1          | 218        | 10          | 1605             |
| 3603      | SR70           | Taiwan         | 2012        | animal                 | R                  | 3           | 3           | 1           | 279        | 1          | 1          | 10          | 3319             |
| 1785      | MRSA-C2487     | China          | 2005        | sputum                 | R                  | 3           | 3           | 126         | 1          | 1          | 1          | 10          | 968              |
| 32911     | S7             | China          | 2014        | nasal swab             | S                  | 3           | 1           | 1           | 1          | 1          | 1          | 10          | 4292             |
| 2693      | 1110807020     | China          | 2008        | dust sample            | R                  | 3           | 73          | 1           | 1          | 1          | 1          | 10          | 1376             |
| 33898     | 2B1-1          | China          | 2016        | human nasal swab       | -                  | 307         | 3           | 1           | 295        | 1          | 1          | 10          | 5051             |
| 4235      | XJ22           | China          | 2009        | mastitis               | R                  | 3           | 35          | 19          | 2          | 20         | 26         | 39          | 398              |
| 32410     | SAV0154        | Czech Republic | 2013        | pork meat              | R                  | 281         | 35          | 19          | 2          | 20         | 26         | 39          | 4034             |
| 31657     | M38            | China          | 2016        | pork                   | R                  | 151         | 3           | 215         | 34         | 175        | 180        | 169         | 3387             |
| 32912     | S31            | China          | 2014        | animal                 | S                  | 151         | 36          | 215         | 34         | 175        | 180        | 169         | 4293             |

Allelic profiles for the seven house keeping genes: carbamate kinase - *arcC*, shikimate dehydrogenase - *aroE*, glycerol kinase - *glpF*, guanylate kinase - *gmk*, phosphate acetyltransferase - *pta*, triosephosphate isomerase - *tpi* and acetyl coenzyme A acetyltransferase - *yqiL*. “ - ” – not available. Strains obtained from

[https://pubmlst.org/bigdb?db=pubmlst\\_saureus\\_isolates&page=query](https://pubmlst.org/bigdb?db=pubmlst_saureus_isolates&page=query)
